# Supplementary material for: Gender Discrimination and Excess Female Under-5 Mortality in India: A New Perspective Using Mixed-Sex Twins
Source: PubMed Central journal article supplement (PMC7732804; doi:10.1007/s13524-020-00909-0), 2020-09-25
Supplement: 13524_2020_909_MOESM1_ESM.pdf [file 13524_2020_909_MOESM1_ESM.pdf]

## Online Appendix

### Gender Discrimination and Excess Female Under-5 Mortality in India: A New Perspective Using Mixed-Sex Twins

Ridhi Kashyap and Julia Behrman

Table A1. Overview of Sub-Saharan Africa DHS survey year and samples used

| <b>Country</b> | <b>Year</b> | <b>Year</b> | <b>Year</b> | <b>Year</b> | <b>Year</b> | <b>Year</b> |
|----------------|-------------|-------------|-------------|-------------|-------------|-------------|
| Benin          | 1996        | 2001        | 2006        | 2011-12     |             |             |
| Burkina Faso   | 1993        | 1998-99     | 2003        | 2010        |             |             |
| Cameroon       | 1991        | 1998        | 2004        | 2011        |             |             |
| Ghana          | 1993        | 1998        | 2003        | 2008        | 2014        |             |
| Kenya          | 1993        | 1998-99     | 2003        | 2008        | 2014        |             |
| Madagascar     | 1992        | 1997        | 2003-04     | 2008-09     |             |             |
| Malawi         | 1992        | 2000        | 2004        | 2010        |             |             |
| Mali           | 1995-96     | 2001        | 2006        | 2012-13     |             |             |
| Namibia        | 1992        | 2000        | 2006-07     | 2013        |             |             |
| Niger          | 1992        | 1998        | 2006        | 2012        |             |             |
| Nigeria        | 1990        | 2003        | 2008        | 2013        |             |             |
| Rwanda         | 1992        | 2000        | 2005        | 2010        | 2014-15     |             |
| Senegal        | 1992        | 1997        | 2005        | 2010-11     | 2012-13     |             |
| Tanzania       | 1991-92     | 1996        | 1999        | 2004-05     | 2010        |             |
| Uganda         | 1995        | 2000-01     | 2006        | 2011        |             |             |
| Zambia         | 1992        | 1996        | 2001-02     | 2006        | 2013-14     |             |
| Zimbabwe       | 1994        | 1999        | 2005-06     | 2010-11     |             |             |

Table A2. Alternative specifications of within mixed sex twin fixed effects models of the association between child sex and infant and child mortality (1-59 months) in India; Panel A uses logistic regression fixed effects with results presented as odds ratios; Panel B uses Cox proportional hazard models with fixed effects with results presented as hazard ratios; Panel C uses linear regression fixed effects, but limits to births in the 10 years before the survey; Panel D uses linear regression fixed effects, but uses an alternative specification of birth cohorts; Panel E uses linear regression fixed effects, with a control for birth weight created through multiple imputation. Estimates use pooled data from the Indian National Family Health Survey (1992-1993, 1998-1998, 2005-2006, 2015-2016). Analysis conducted in STATA 15.

| <i>Panel A. Logistic regression fixed effects</i>   |                             |                             |                                 |                                |
|-----------------------------------------------------|-----------------------------|-----------------------------|---------------------------------|--------------------------------|
|                                                     | (1)                         | (2)                         | (3)                             | (4)                            |
|                                                     | Mortality<br>1-59 mos.      | Mortality<br>1-59 mos.      | Mortality<br>1-59 mos.          | Mortality<br>1-59 mos.         |
|                                                     | Pooled                      | Born<br>before<br>1995      | Born 1995-<br>2005              | Born after<br>2005             |
| Female                                              | 1.468***<br>(0.160)         | 1.891***<br>(0.301)         | 1.088<br>(0.219)                | 0.980<br>(0.263)               |
| First born twin                                     | 0.514***<br>(0.056)         | 0.680*<br>(0.108)           | 0.397***<br>(0.080)             | 0.311***<br>(0.083)            |
| Observations                                        | 782                         | 366                         | 248                             | 168                            |
| Number of families                                  | 391                         | 183                         | 124                             | 84                             |
| <i>Panel B. Cox proportional hazards</i>            |                             |                             |                                 |                                |
|                                                     | (1)                         | (2)                         | (3)                             | (4)                            |
|                                                     | Age at<br>death<br>(months) | Age at<br>death<br>(months) | Age at<br>death<br>(months)     | Age at<br>death<br>(months)    |
|                                                     | Pooled                      | Born<br>before<br>1995      | Born 1995-<br>2005              | Born after<br>2005             |
| Female                                              | 1.427***<br>(0.146)         | 2.006***<br>(0.290)         | 1.094<br>(0.207)                | 0.685<br>(0.181)               |
| First born twin                                     | 0.420***<br>(0.044)         | 0.716*<br>(0.103)           | 0.280***<br>(0.056)             | 0.146***<br>(0.042)            |
| Observations                                        | 6,190                       | 1,866                       | 2,278                           | 2,046                          |
| Number of families                                  | 3095                        | 933                         | 1139                            | 1023                           |
| <i>Panel C. Limiting to births in last 10 years</i> |                             |                             |                                 |                                |
|                                                     | (1)                         | (2)                         | (3)                             | (4)                            |
|                                                     | Mortality<br>1-59 mos.      | Mortality<br>1-59 mos.      | Mortality<br>1-59 mos.          | Mortality<br>1-59 mos.         |
|                                                     | Pooled                      | Born<br>before<br>1995      | Born 1995-<br>2005              | Born after<br>2005             |
| Female                                              | 0.022*<br>(0.009)           | 0.102***<br>(0.027)         | <b>-0.006</b><br><b>(0.022)</b> | <b>0.007</b><br><b>(0.009)</b> |
| First born twin                                     | -0.019*<br>(0.009)          | 0.043<br>(0.027)            | -0.001<br>(0.022)               | -0.042***<br>(0.009)           |

|                         |                     |                    |                     |                     |
|-------------------------|---------------------|--------------------|---------------------|---------------------|
| Constant                | 0.077***<br>(0.008) | 0.076**<br>(0.025) | 0.100***<br>(0.020) | 0.069***<br>(0.008) |
| Observations            | 3,298               | 600                | 644                 | 2,054               |
| R-squared               | 0.007               | 0.049              | 0.000               | 0.023               |
| Number of families      | 1,649               | 300                | 322                 | 1,027               |
| Baseline male mortality | 0.066               | 0.100              | 0.099               | 0.046               |

| <i>Panel D. Alternative birth cohorts</i> | (1)                              | (2)                                                     | (3)                                  | (4)                                        |
|-------------------------------------------|----------------------------------|---------------------------------------------------------|--------------------------------------|--------------------------------------------|
|                                           | Mortality<br>1-59 mos.<br>Pooled | Mortality<br>1-59 mos.<br>Born<br>before or in<br>1980s | Mortality<br>1-59 mos.<br>Born 1990s | Mortality<br>1-59 mos.<br>Born in<br>2000s |
| Female                                    | 0.020**<br>(0.006)               | 0.063**<br>(0.020)                                      | <b>0.014</b><br><b>(0.013)</b>       | <b>0.009</b><br><b>(0.007)</b>             |
| First born twin                           | -0.039***<br>(0.006)             | -0.014<br>(0.020)                                       | -0.047***<br>(0.013)                 | -0.042***<br>(0.007)                       |
| Constant                                  | 0.097***<br>(0.006)              | 0.145***<br>(0.018)                                     | 0.112***<br>(0.012)                  | 0.073***<br>(0.006)                        |
| Observations                              | 6,200                            | 1,142                                                   | 1,676                                | 3,382                                      |
| R-squared                                 | 0.017                            | 0.020                                                   | 0.019                                | 0.022                                      |
| Number of families                        | 3,100                            | 571                                                     | 838                                  | 1,691                                      |
| Baseline male mortality                   | 0.075                            | 0.137                                                   | 0.086                                | 0.050                                      |

| <i>Panel E. Including birth weight</i> | (1)                              | (2)                                              | (3)                                          | (4)                                          |
|----------------------------------------|----------------------------------|--------------------------------------------------|----------------------------------------------|----------------------------------------------|
|                                        | Mortality<br>1-59 mos.<br>Pooled | Mortality<br>1-59 mos.<br>Born<br>before<br>1995 | Mortality<br>1-59 mos.<br>Born 1995-<br>2005 | Mortality<br>1-59 mos.<br>Born after<br>2005 |
| Female                                 | 0.020**<br>(0.006)               | 0.053***<br>(0.015)                              | <b>0.006</b><br><b>(0.010)</b>               | <b>0.007</b><br><b>(0.009)</b>               |
| First born twin                        | -0.039***<br>(0.006)             | -0.022<br>(0.015)                                | -0.047***<br>(0.010)                         | -0.042***<br>(0.009)                         |
| Birth weight                           | -0.000<br>(0.000)                | -0.000<br>(0.000)                                | -0.000<br>(0.000)                            | -0.000<br>(0.000)                            |
| Constant                               | 0.103***<br>(0.021)              | 0.131**<br>(0.048)                               | 0.106***<br>(0.032)                          | 0.076*<br>(0.032)                            |
| Observations                           | 6,200                            | 1,868                                            | 2,278                                        | 2,054                                        |
| Number of families                     | 3,100                            | 934                                              | 1,139                                        | 1,027                                        |
| Baseline male mortality                | 0.075                            | 0.118                                            | 0.068                                        | 0.046                                        |

\*\*\* p<0.001, \*\* p<0.01, \* p<0.05

*Notes:* Bold numbers indicate statistically significant ( $p < 0.05$ ) difference between the birth cohort in question and the first birth cohort (e.g. born before 1995). In Panel B, respondents are censored at age at survey or 59 months (whichever comes first).

Table A3. Additional information on sub-Saharan African sample; Panel A presents descriptive summary of background characteristics of mixed-sex twins for sub-Saharan Africa sample, including tests for significant difference between the first birth cohort and the two subsequent cohorts (estimates use sampling weights provided by the DHS); Panel B presents difference-in-difference analysis using pooled Africa and India data and an interaction between female and India.

| Panel A.                       | (1)           | (2)                     | (3)                   | (4)                    |
|--------------------------------|---------------|-------------------------|-----------------------|------------------------|
|                                | <i>Pooled</i> | <i>Born before 1995</i> | <i>Born 1995-2005</i> | <i>Born after 2005</i> |
| Mortality (1-59 mos.)          | 0.18          | 0.24                    | <b>0.17</b>           | <b>0.09</b>            |
| Female                         | 0.50          | 0.50                    | 0.50                  | 0.50                   |
| Birth year                     | 1996          | 1987                    | <b>2000</b>           | <b>2009</b>            |
| Birth order                    | 4.46          | 4.39                    | <b>4.53</b>           | 4.45                   |
| Rural                          | 0.72          | 0.74                    | 0.73                  | <b>0.67</b>            |
| Mother no school               | 0.47          | 0.51                    | <b>0.46</b>           | <b>0.42</b>            |
| Mother primary school          | 0.36          | 0.37                    | 0.36                  | <b>0.33</b>            |
| Mother secondary school        | 0.15          | 0.11                    | <b>0.16</b>           | <b>0.21</b>            |
| Mother tertiary                | 0.02          | 0.01                    | <b>0.02</b>           | <b>0.04</b>            |
| Mother age at birth            | 27.66         | 26.36                   | <b>28.17</b>          | <b>29.23</b>           |
| Total children born to mother  | 6.52          | 7.39                    | <b>6.26</b>           | <b>5.27</b>            |
| Mother's ideal number of boys  | 2.49          | 2.59                    | <b>2.50</b>           | <b>2.32</b>            |
| Mother's ideal number of girls | 2.34          | 2.47                    | <b>2.35</b>           | <b>2.12</b>            |
| Mother's ideal sex ratio       | 0.51          | 0.51                    | <b>0.52</b>           | <b>0.52</b>            |
| N                              | 17,963        | 7,124                   | 7,533                 | 3,306                  |

*Notes:* All measures are dichotomous except birth year (ranges from 1960 to 2014), birth order (ranges from 1 to 14), mother age at birth (ranges from 10 to 47), total children born (ranges from 1 to 16), mother's ideal boys (ranges from 0 to 20), mother's ideal girls (ranges from 0 to 15), and ideal sex ratio (ranges from 0 to 1 and excludes women who desire zero children). Bold numbers indicate statistically significant ( $p < 0.05$ ) difference between the birth cohort in question and the first birth cohort (e.g. born before 1995). Two-sample t tests for all continuous outcomes, and chi-square tests for all dichotomous outcomes. Singleton sample all live in households with no other twins.

| Panel B.                          | (1)                    |
|-----------------------------------|------------------------|
|                                   | Mortality<br>1-59 mos. |
| Female                            | -0.016**<br>(0.005)    |
| First born twin                   | -0.040***<br>(0.005)   |
| India                             | -0.094***<br>(0.008)   |
| Female*India                      | 0.035***<br>(0.011)    |
| Born 1995-2005 (ref=before 1995)  | -0.071***<br>(0.005)   |
| Born after 2005 (ref=before 1995) | -0.130***<br>(0.006)   |
| Constant                          | 0.264***<br>(0.005)    |

|                                         |        |
|-----------------------------------------|--------|
| Observations                            | 24,163 |
| R-squared                               | 0.033  |
| <i>Baseline level of male mortality</i> | 0.157  |

---

\*\*\* p<0.001, \*\* p<0.01, \* p<0.05

Table A4. Descriptive summary of background characteristics of singletons (Panel A); female same-sex twins (Panel B); and male same-sex twins (Panel C) including tests for significant difference between the first birth cohort and the two subsequent cohorts. All estimates use pooled data from the Indian National Family Health Survey (1992-1993, 1998-1998, 2005-2006, 2015-2016) and use sampling weights provided by the NFHS.

| Panel A.                       | Singleton sample: |                         |                       |                        |
|--------------------------------|-------------------|-------------------------|-----------------------|------------------------|
|                                | (1)               | (2)                     | (3)                   | (4)                    |
|                                | <i>Pooled</i>     | <i>Born before 1995</i> | <i>Born 1995-2005</i> | <i>Born after 2005</i> |
| Mortality (1-59 mos.)          | 0.04              | 0.07                    | <b>0.03</b>           | <b>0.02</b>            |
| Female                         | 0.48              | 0.48                    | 0.48                  | 0.48                   |
| Birth year                     | 1996              | 1985                    | <b>2000</b>           | <b>2010</b>            |
| Birth order                    | 2.43              | 2.48                    | 2.48                  | <b>2.29</b>            |
| Rural                          | 0.72              | 0.72                    | <b>0.71</b>           | <b>0.71</b>            |
| Northern region                | 0.60              | 0.59                    | <b>0.60</b>           | <b>0.60</b>            |
| Hindu                          | 0.80              | 0.81                    | <b>0.79</b>           | <b>0.78</b>            |
| Poorest 40%                    | 0.44              | 0.40                    | <b>0.46</b>           | <b>0.48</b>            |
| Mother no school               | 0.52              | 0.63                    | <b>0.51</b>           | <b>0.35</b>            |
| Mother primary school          | 0.16              | 0.16                    | <b>0.15</b>           | <b>0.15</b>            |
| Mother secondary school        | 0.27              | 0.18                    | <b>0.29</b>           | <b>0.42</b>            |
| Mother tertiary                | 0.05              | 0.02                    | <b>0.05</b>           | <b>0.09</b>            |
| Mother age at birth            | 23.29             | 22.14                   | <b>23.75</b>          | <b>24.61</b>           |
| Total children born to mother  | 3.83              | 4.49                    | <b>3.70</b>           | <b>2.86</b>            |
| Mother's ideal number of boys  | 1.40              | 1.54                    | <b>1.35</b>           | <b>1.24</b>            |
| Mother's ideal number of girls | 1.06              | 1.10                    | <b>1.04</b>           | <b>1.00</b>            |
| Mother's ideal sex ratio       | 0.57              | 0.58                    | <b>0.56</b>           | <b>0.55</b>            |
| N                              | 2004684           | 803490                  | 692572                | 508622                 |

*Notes:* All measures are dichotomous except birth year (ranges from 1954 to 2016), birth order (ranges from 1 to 18), mother age at birth (ranges from 10 to 50), total children born (ranges from 1 to 18), mother's ideal boys (ranges from 0 to 20), mother's ideal girls (ranges from 0 to 11), and ideal sex ratio (ranges from 0 to 1 and excludes women who desire zero children). Bold numbers indicate statistically significant ( $p < 0.05$ ) difference between the birth cohort in question and the first birth cohort (e.g. born before 1995). Two-sample t tests for all continuous outcomes, and chi-square tests for all dichotomous outcomes.

| Panel B.              | Female same sex twin sample: |                         |                       |                        |
|-----------------------|------------------------------|-------------------------|-----------------------|------------------------|
|                       | (1)                          | (2)                     | (3)                   | (4)                    |
|                       | <i>Pooled</i>                | <i>Born before 1995</i> | <i>Born 1995-2005</i> | <i>Born after 2005</i> |
| Mortality (1-59 mos.) | 0.12                         | 0.20                    | <b>0.09</b>           | <b>0.06</b>            |
| Female                | 1.00                         | 1.00                    | 1.00                  | 1.00                   |
| Birth year            | 1999                         | 1986                    | <b>2000</b>           | <b>2011</b>            |
| Birth order           | 3.04                         | 3.27                    | <b>3.03</b>           | <b>2.82</b>            |
| Rural                 | 0.66                         | 0.68                    | 0.64                  | 0.67                   |
| Northern region       | 0.55                         | 0.51                    | <b>0.55</b>           | <b>0.60</b>            |

|                                |       |       |              |              |
|--------------------------------|-------|-------|--------------|--------------|
| Hindu                          | 0.76  | 0.77  | 0.77         | 0.74         |
| Poorest 40%                    | 0.40  | 0.33  | <b>0.38</b>  | <b>0.49</b>  |
| Mother no school               | 0.45  | 0.57  | <b>0.41</b>  | <b>0.36</b>  |
| Mother primary school          | 0.15  | 0.16  | 0.18         | <b>0.12</b>  |
| Mother secondary school        | 0.33  | 0.23  | <b>0.35</b>  | <b>0.40</b>  |
| Mother tertiary                | 0.07  | 0.04  | 0.06         | <b>0.12</b>  |
| Mother age at birth            | 24.43 | 23.26 | <b>24.65</b> | <b>25.36</b> |
| Total children born to mother  | 4.48  | 5.15  | <b>4.53</b>  | <b>3.74</b>  |
| Mother's ideal number of boys  | 1.34  | 1.46  | <b>1.31</b>  | <b>1.27</b>  |
| Mother's ideal number of girls | 1.14  | 1.18  | 1.18         | <b>1.06</b>  |
| Mother's ideal sex ratio       | 0.54  | 0.55  | <b>0.53</b>  | 0.54         |
| N                              | 6149  | 1991  | 2134         | 2024         |

*Notes:* All measures are dichotomous except birth year (ranges from 1962 to 2016), birth order (ranges from 1 to 13), mother age at birth (ranges from 12 to 48), total children born (ranges from 2 to 14), mother's ideal boys (ranges from 0 to 8), mother's ideal girls (ranges from 0 to 6), and ideal sex ratio (ranges from 0 to 1 and excludes women who desire zero children). Bold numbers indicate statistically significant ( $p < 0.05$ ) difference between the birth cohort in question and the first birth cohort (e.g. born before 1995). Two-sample t tests for all continuous outcomes, and chi-square tests for all dichotomous outcomes.

| Panel C.                       | Male same sex twin sample: |                         |                       |                        |
|--------------------------------|----------------------------|-------------------------|-----------------------|------------------------|
|                                | (1)                        | (2)                     | (3)                   | (4)                    |
|                                | <i>Pooled</i>              | <i>Born before 1995</i> | <i>Born 1995-2005</i> | <i>Born after 2005</i> |
| Mortality (1-59 mos.)          | 0.09                       | 0.17                    | <b>0.07</b>           | <b>0.05</b>            |
| Female                         | 0.00                       | 0.00                    | 0.00                  | 0.00                   |
| Birth year                     | 1999                       | 1986                    | <b>2000</b>           | <b>2011</b>            |
| Birth order                    | 3.19                       | 3.39                    | 3.29                  | <b>2.86</b>            |
| Rural                          | 0.67                       | 0.66                    | 0.67                  | 0.69                   |
| Northern region                | 0.54                       | 0.53                    | 0.55                  | 0.53                   |
| Hindu                          | 0.77                       | 0.81                    | 0.78                  | <b>0.73</b>            |
| Poorest 40%                    | 0.36                       | 0.33                    | <b>0.39</b>           | 0.37                   |
| Mother no school               | 0.45                       | 0.58                    | <b>0.48</b>           | <b>0.27</b>            |
| Mother primary school          | 0.14                       | 0.16                    | 0.13                  | <b>0.13</b>            |
| Mother secondary school        | 0.33                       | 0.19                    | <b>0.31</b>           | <b>0.49</b>            |
| Mother tertiary                | 0.08                       | 0.06                    | 0.07                  | <b>0.11</b>            |
| Mother age at birth            | 24.95                      | 23.69                   | <b>25.34</b>          | <b>25.79</b>           |
| Total children born to mother  | 4.33                       | 5.09                    | <b>4.31</b>           | <b>3.56</b>            |
| Mother's ideal number of boys  | 1.42                       | 1.54                    | <b>1.44</b>           | <b>1.29</b>            |
| Mother's ideal number of girls | 1.02                       | 1.04                    | 1.03                  | <b>0.97</b>            |
| Mother's ideal sex ratio       | 0.58                       | 0.59                    | 0.58                  | <b>0.57</b>            |
| N                              | 6469                       | 2074                    | 2310                  | 2085                   |



---

*Notes:* All measures are dichotomous except birth year (ranges from 1961 to 2016), birth order (ranges from 1 to 13), mother age at birth (ranges from 10 to 44), total children born (ranges from 2 to 15), mother's ideal boys (ranges from 0 to 9), mother's ideal girls (ranges from 0 to 8), and ideal sex ratio (ranges from 0 to 1 and excludes women who desire zero children). Bold numbers indicate statistically significant ( $p < 0.05$ ) difference between the birth cohort in question and the first birth cohort (e.g. born before 1995). Two-sample t tests for all continuous outcomes, and chi-square tests for all dichotomous outcomes.



|                                  |           |           |           |           |           |           |           |
|----------------------------------|-----------|-----------|-----------|-----------|-----------|-----------|-----------|
| Born after 2005*Mother secondary |           |           |           |           |           |           | (0.001)   |
|                                  |           |           |           |           |           |           | -0.001    |
|                                  |           |           |           |           |           |           | (0.001)   |
| Born 1995-2005*Mother tertiary   |           |           |           |           |           |           | -0.000    |
|                                  |           |           |           |           |           |           | (0.000)   |
| Born after 2005*Mother tertiary  |           |           |           |           |           |           | 0.003*    |
|                                  |           |           |           |           |           |           | (0.001)   |
| Observations                     | 2,010,880 | 2,010,880 | 2,010,880 | 2,010,880 | 2,010,880 | 2,010,880 | 2,010,880 |
| R-squared                        | 0.000     | 0.000     | 0.000     | 0.000     | 0.000     | 0.000     | 0.000     |

Robust standard errors in parentheses clustered at the family level

\*\*\* p<0.001, \*\* p<0.01, \* p<0.05

Notes: Models 2-7 include controls for birth year, female, and survey round (not shown). 4 observations from the twin sample are dropped due to missing information on background covariates.

Table A6. OLS regression models of the association between child sex and infant and child mortality (1-59 months) using a sample of singleton children (Panel A); within family fixed effects estimates of the association between child sex and infant and child mortality (1-59 months) (Panel B). All estimates use pooled data from the Indian National Family Health Survey (1992-1993, 1998-1998, 2005-2006, 2015-2016). Analysis conducted in STATA 15.

| <i>Panel A. OLS</i>     | (1)                              |    | (2)                                           |    | (3)                                          |    | (4)                                          |    |
|-------------------------|----------------------------------|----|-----------------------------------------------|----|----------------------------------------------|----|----------------------------------------------|----|
|                         | Mortality<br>1-59 mos.<br>Pooled | 1- | Mortality<br>1-59 mos.<br>Born before<br>1995 | 1- | Mortality<br>1-59 mos.<br>Born 1995-<br>2005 | 1- | Mortality<br>1-59 mos.<br>Born after<br>2005 | 1- |
| Female                  | 0.007***<br>(0.000)              |    | 0.011***<br>(0.001)                           |    | <b>0.005***</b><br><b>(0.000)</b>            |    | <b>0.002***</b><br><b>(0.000)</b>            |    |
| Background controls     | YES                              |    | YES                                           |    | YES                                          |    | YES                                          |    |
| Observations            | 2,004,684                        |    | 803,490                                       |    | 692,572                                      |    | 508,622                                      |    |
| R-squared               | 0.021                            |    | 0.023                                         |    | 0.008                                        |    | 0.005                                        |    |
| Baseline male mortality | 0.036                            |    | 0.056                                         |    | 0.027                                        |    | 0.019                                        |    |

\*\*\* p<0.001, \*\* p<0.01, \* p<0.05

*Notes:* Background controls include rural, northern region, mother's school, poorest 40%, birth year, birth order, and survey round. Bold numbers indicate statistically significant (p<0.05) difference between the birth cohort in question and the first birth cohort (e.g. born before 1995). Robust standard errors clustered at the family level. Neonatal mortality excluded to correspond with within twin FE estimates.

| <i>Panel B. Within family FE</i> | (1)                              |    | (2)                                           |    | (3)                                          |    | (4)                                          |    |
|----------------------------------|----------------------------------|----|-----------------------------------------------|----|----------------------------------------------|----|----------------------------------------------|----|
|                                  | Mortality<br>1-59 mos.<br>Pooled | 1- | Mortality<br>1-59 mos.<br>Born before<br>1995 | 1- | Mortality<br>1-59 mos.<br>Born 1995-<br>2005 | 1- | Mortality<br>1-59 mos.<br>Born after<br>2005 | 1- |
| Female                           | 0.006***<br>(0.000)              |    | 0.012***<br>(0.001)                           |    | <b>0.005***</b><br><b>(0.001)</b>            |    | <b>0.001</b><br><b>(0.001)</b>               |    |
| Background controls              | YES                              |    | YES                                           |    | YES                                          |    | YES                                          |    |
| Observations                     | 1,971,714                        |    | 787,717                                       |    | 681,111                                      |    | 502,886                                      |    |
| R-squared                        | 0.007                            |    | 0.008                                         |    | 0.002                                        |    | 0.004                                        |    |
| Number of families               | 704,348                          |    | 293,432                                       |    | 343,664                                      |    | 289,148                                      |    |
| Baseline male mortality          | 0.036                            |    | 0.065                                         |    | 0.034                                        |    | 0.021                                        |    |

\*\*\* p<0.001, \*\* p<0.01, \* p<0.05

*Notes:* Background controls include birth order and year of birth. Bold numbers indicate statistically significant (p<0.05) difference between the birth cohort in question and the first birth cohort (e.g. born before 1995). Excludes families with twins. Neonatal mortality excluded to correspond with within twin FE estimates.

Table A7. Within mixed sex twin fixed effects models of the association between child sex and infant and child mortality (1-59 months) in India, excluding twins born in 2014-2016. Estimates use pooled data from the Indian National Family Health Survey (1992-1993, 1998-1998, 2005-2006, 2015-2016). Analysis conducted in STATA 15.

|                            | (1)                              | (2)                                           | (3)                                          | (4)                                          |
|----------------------------|----------------------------------|-----------------------------------------------|----------------------------------------------|----------------------------------------------|
|                            | Mortality<br>1-59 mos.<br>Pooled | Mortality<br>1-59 mos.<br>Born before<br>1995 | Mortality<br>1-59 mos.<br>Born 1995-<br>2005 | Mortality<br>1-59 mos.<br>Born after<br>2005 |
| Female                     | 0.022***<br>(0.007)              | 0.053***<br>(0.015)                           | 0.006<br>(0.010)                             | 0.011<br>(0.010)                             |
| First born twin            | -0.039***<br>(0.007)             | -0.023<br>(0.015)                             | -0.047***<br>(0.010)                         | -0.046***<br>(0.010)                         |
| Constant                   | 0.100***<br>(0.006)              | 0.131***<br>(0.013)                           | 0.093***<br>(0.009)                          | 0.071***<br>(0.009)                          |
| Observations               | 5,800                            | 1,868                                         | 2,278                                        | 1,654                                        |
| R-squared                  | 0.017                            | 0.019                                         | 0.021                                        | 0.027                                        |
| Number of families         | 2,900                            | 934                                           | 1,139                                        | 827                                          |
| Baseline male<br>mortality | 0.078                            | 0.118                                         | 0.068                                        | 0.046                                        |

\*\*\* p<0.001, \*\* p<0.01, \* p<0.05

Notes: Bold numbers indicate statistically significant (p<0.05) difference between the birth cohort in question and the first birth cohort (e.g. born before 1995).
